# Supplementary material for: Tannery solid waste-derived cross-scale deformable piezoresistive sensors for monitoring human body motions
Source: Royal Society of Chemistry journal article supplement (doi:10.1039/d2tc00718e), 2022-01-01
Supplement: d2tc00718e1.pdf [file d2tc00718e1.pdf]

## Tannery solid wastes-derived cross-scale deformable piezoresistive sensors for monitoring human body motions

Yingjie Wei,<sup>ab</sup> Baicun Hao,<sup>ab</sup> Yanan Wang,<sup>ab</sup> Yujia Wang,<sup>b</sup> Hanzhong Xiao,<sup>b</sup> Li Li,<sup>c,d,e,f</sup> Xin Huang,<sup>\*ab</sup> Bi Shi,<sup>ab</sup>

<sup>a</sup> National Engineering Laboratory for Clean Technology of Leather Manufacture, Sichuan University, Chengdu 610065, P.R. China.

<sup>b</sup> Department of Biomass Chemistry and Engineering, Sichuan University, Chengdu 610065, P.R. China.

<sup>c</sup> Cosmetics Safety and Efficacy Evaluation Center, West China Hospital, Sichuan University, Chengdu 610065, P.R. China

<sup>d</sup> Department of Dermatology, West China Hospital, Sichuan University, Chengdu 610065, P.R. China

<sup>e</sup> NMPA Key Laboratory for Human Evaluation and Big Data of Cosmetics, Sichuan University, Chengdu 610065, P.R. China

<sup>f</sup> Sichuan Engineering Technology Research Center of Cosmetic, Chengdu 610065, P.R. China

Email address: xhuangscu@163.com (X. Huang)

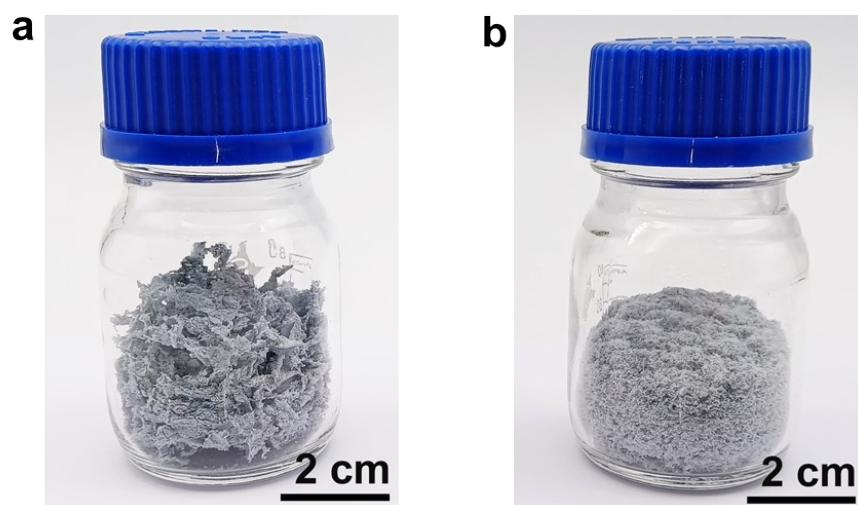

**Figure S1.** Digital photographs of (a) TSWs and (b) TSWs after being milled.

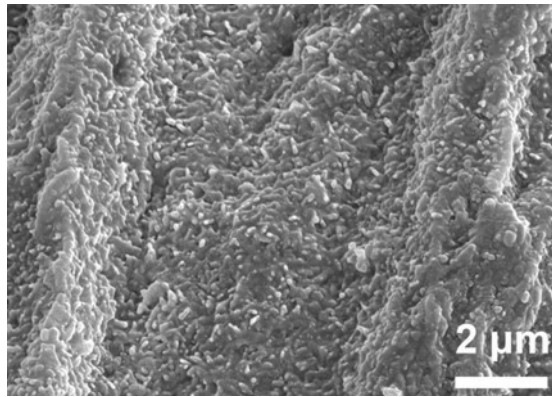

**Figure S2.** FESEM image showing the rough surface of conductive PSDM-structured foam.

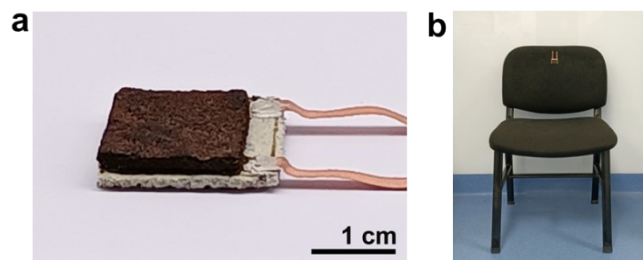

**Figure S3.** (a) Digital photograph showing the cross-scale deformable piezoresistive sensor, and (b) the chair equipped with the cross-scale deformable piezoresistive sensor.

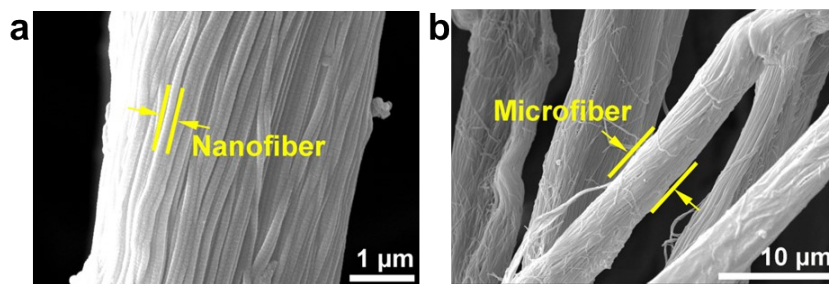

**Figure S4.** FESEM images showing the hierarchically fibrous structure of CFs, from (a) nanoscale to (b) microscale.

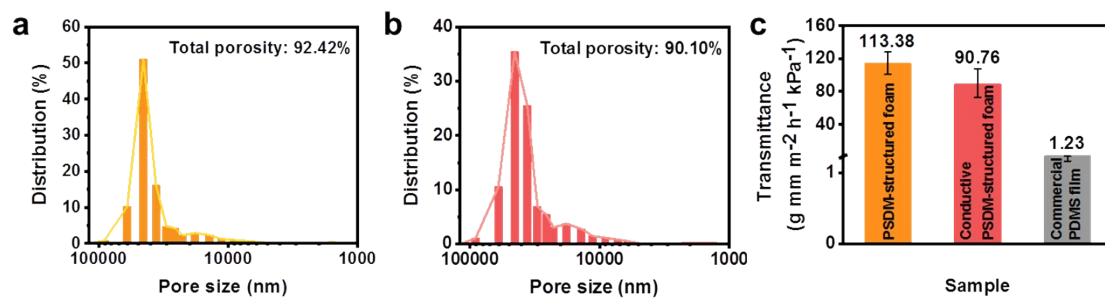

**Figure S5.** The porosity distribution of (a) the PSDM-structured foam and (b) the conductive PSDM-structured foam, (c) comparisons of the water-vapor permeability among the PSDM-structured foam, the conductive PSDM-structured foam and the commercial PDMS film.
